# Supplementary material for: Safety and Immunogenicity of Combined DNA-Polyethylenimine and Oral Bacterial Idiotypic Vaccine for Patients with B-Cell Non-Hodgkin Lymphoma: A Pilot Study
Source: MDPI journal article supplement (doi:10.3390/cancers14143298), 2022-07-06
Supplement: s1 [file s1]

# **Supplementary Materials: Safety and Immunogenicity of Combined DNA-Polyethylenimine and Oral Bacterial Idiotypic Vaccine for Patients with B-Cell Non-Hodgkin Lymphoma: A Pilot Study**

Alexander Meleshko, Nadzeya Piatrouskaya, Katsiaryna Vashkevich, Dzmitry Lutskovich, Chuan Wang, Dmitri Dormeshkin, Natalia Savelyeva and Mikalai Katsin

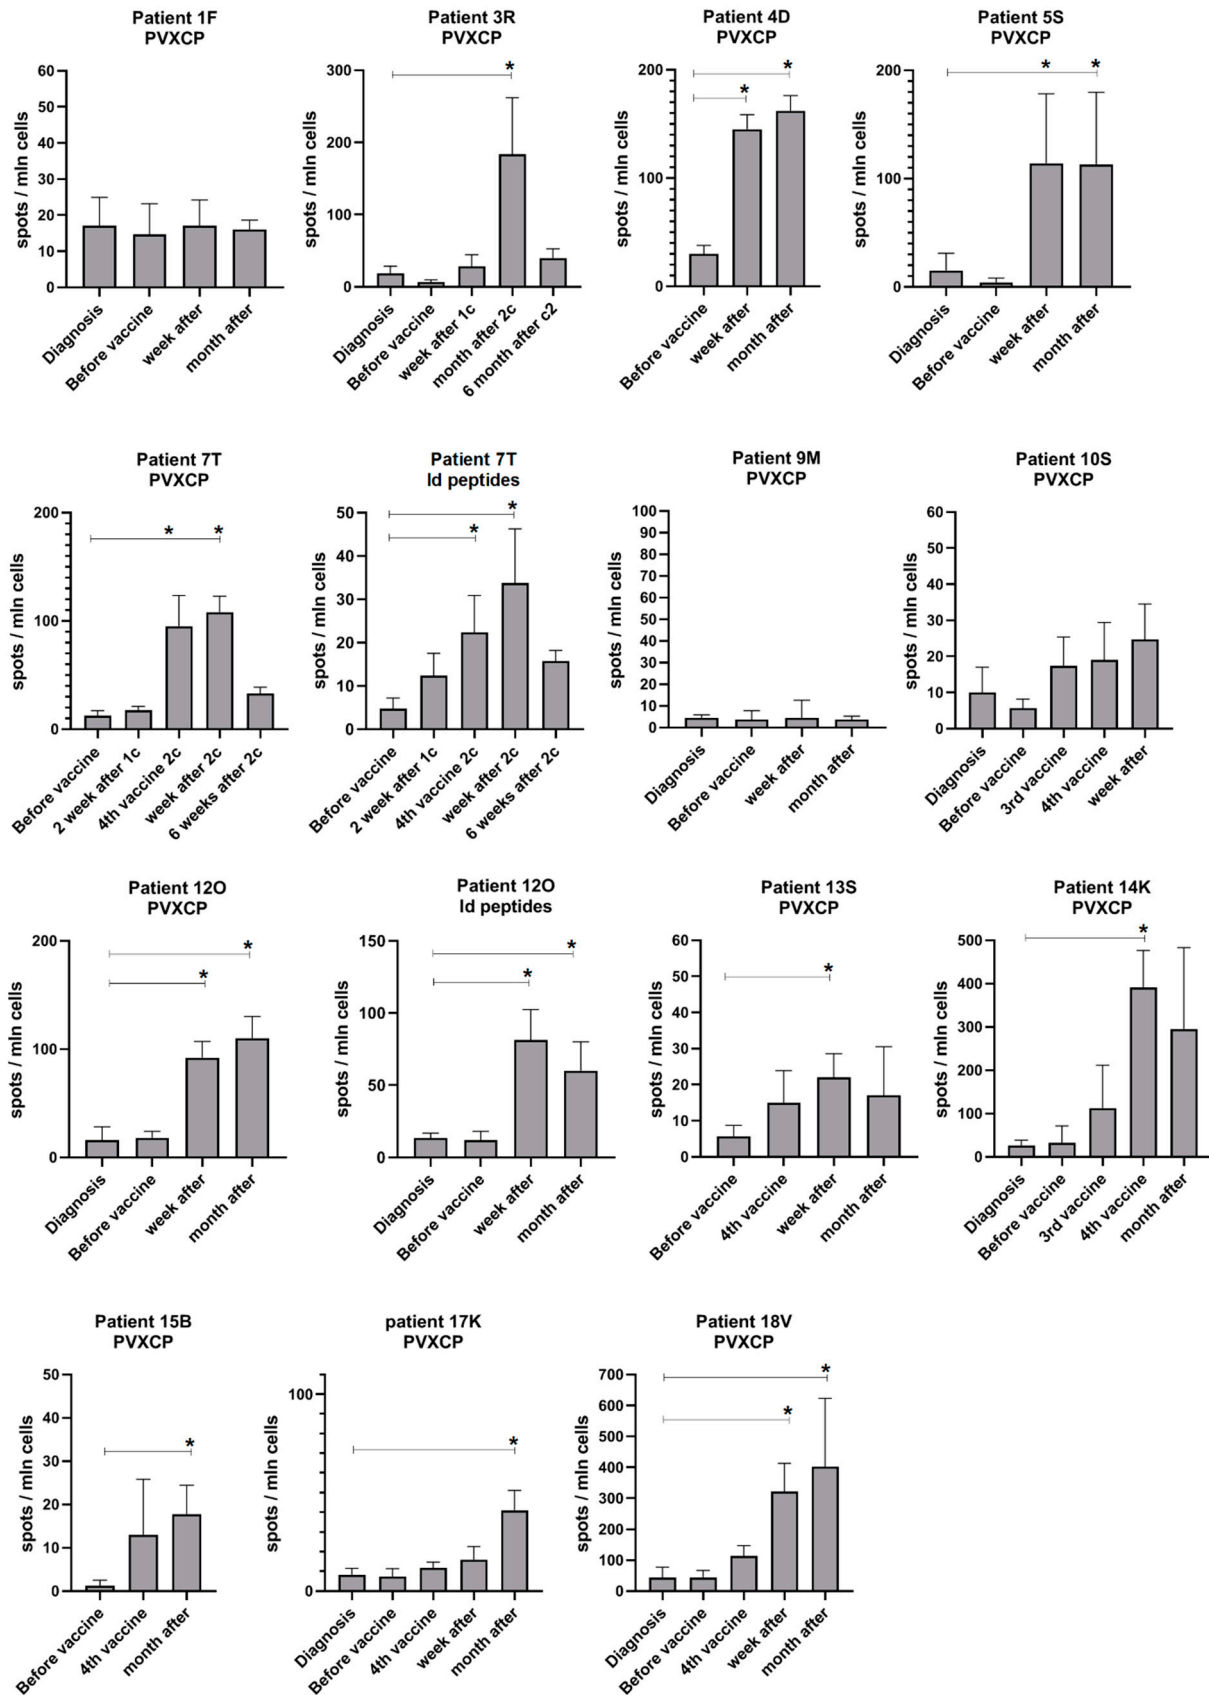

**Figure S1.** ELISpot test for all patients. 1c—first vaccine course, 2c—second vaccine course (indicated only for patients who have had two courses of vaccination). For some patients, material was available at additional points (on the day of the 3rd or 4th vaccine), these points are also presented in the graph. A significant difference ( $p < 0.05$ ) in the number of spots between time points is indicated by the asterisk (Student's *t*-test).

### ELISA patients 3-10

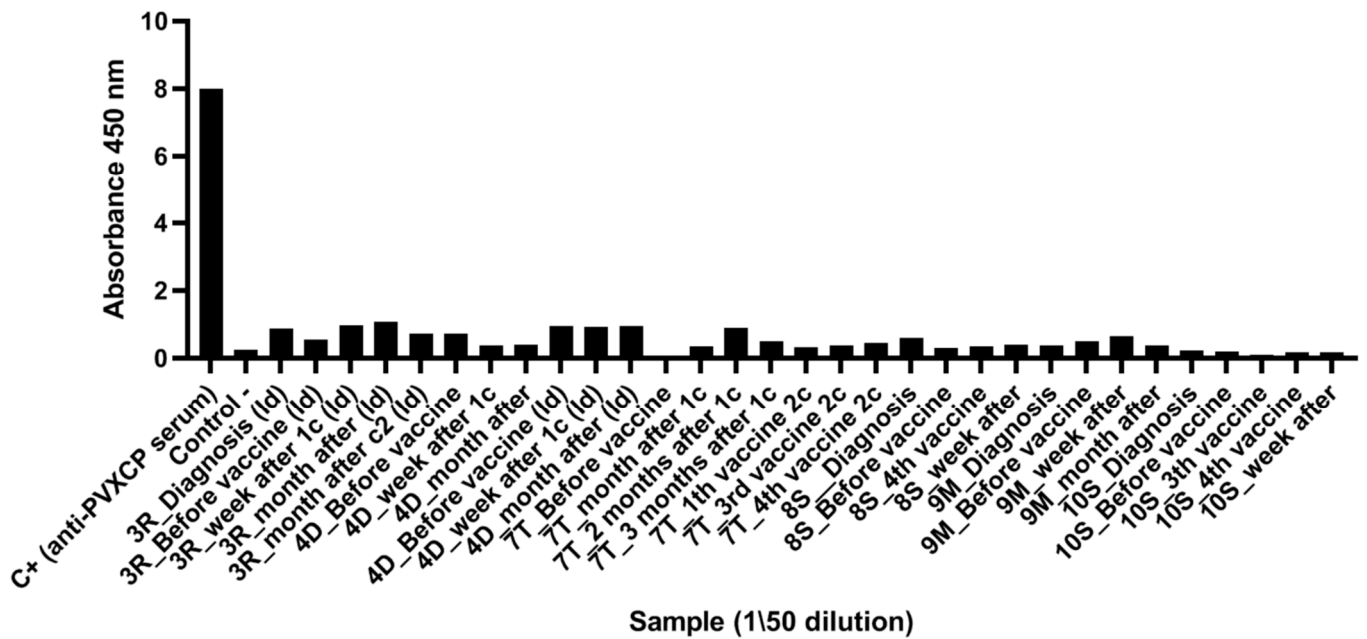

### ELISA patients 11-19

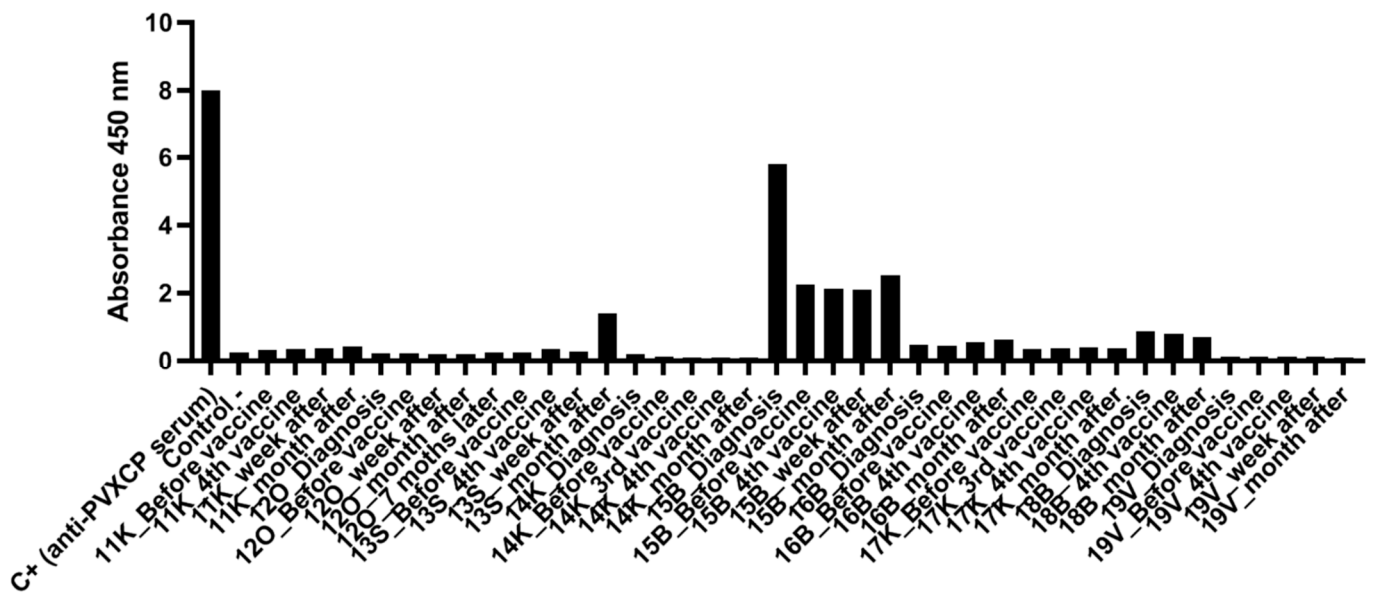

**Figure S2.** ELISA test for all patients and controls. Id—antigen is the patient's idiotype protein, other samples tested against PVXCP protein. 1c—first vaccine course, 2c—second vaccine course (indicated only for patients who have had two courses of vaccination). Positive control—mouse immune serum, negative control—medium.

**Table S1.** Sequences of variable regions (idiotypes) of patients' Ig genes included in the study, and the degree of germline homology.

| Patient | Idiotype | Sequence                                                                                                                                                                                                                                                                                                                                                                                                                                                                  | VH/VL<br>Germline |
|---------|----------|---------------------------------------------------------------------------------------------------------------------------------------------------------------------------------------------------------------------------------------------------------------------------------------------------------------------------------------------------------------------------------------------------------------------------------------------------------------------------|-------------------|
| 1F      | IgM,D    | ATGGAAGTGGAGGTTCTCTTTGTGGTGGCAGCAGCTACAGGTGTCCAGTCCCAGGTGCAGCTGGTGCAGTCTGGGGCTG<br>AGGTGAAGAAGCCTGGGTCTCGGTGAAGGTCTCTGCAAGGCTTCTGGAGGCACCTTCAGCAGCTATGCTATCAGCTGGGTGCG<br>ACAGGCCCCCTGGACAAGGGCTTGAGTGGATGGGAGGGATCATCCCTATCTTTGGTACAGCAAACACGCACAGAAGTTCCAGGGC<br>AGAGTACAGATTACCGCGGACGAATCCACGAGCAGCCCTACATGGAGCTGAGCAGCCTGAGATCTGAGGACACGGCCGTGTATT<br>ACTGTGCGAGAGTCCAATCGGCGATTCTTTGGAGTGGTTATTCTTTGGGCTTACTACTACTACATGGACGTCTGGGGCAAGGGAC<br>CACGGTCACCGTCTCCTCA   | 100%              |
| 1F      | IgK      | GACATCCAGATGACCCAGTCTCCATCTTCCGTGTCTGCATCTGTAGGAGACAGAGTCACCATCACTTGTCTGGGCGAGTCAAGGTA<br>TTAGCAGCTGGTTAGCCTGGTATCAGCAGAAACAGGGAAAGCCCTAAGCTCCTGATCTATGCTGCATCCAGTTTGGCAAAGTGG<br>GGTCCCATCAAGGTTTCAGCGGCAGTGGATCTGGGACAGATTTCACTCTCACCATCAGCAGCCTGCAGCCTGAAGATTTTGCAACT<br>TACTATTGTCAACAGGCTAACAGTTCCCGTGACCTGGGACCAAGTGGATATCAAAC                                                                                                                                      | 100%              |
| 2K      | IgD      | ATGAAACACCTGTGGTCTTCTCTCTCTGGTGGCAGCTCCCAGATGGGTCTGTCCCAGGTGCAGCTGCAGGAGTCTGGGGCCAG<br>GACTGGTGAAGCCTTCGGAGACCCGTGTCCTCACCTGCAGTGTCTCTGGTGGCTCCGTGAGCAGTGGTAGTTACTACTGGAGCTG<br>GATCCGGCAGCCCCAGGGAAGGGACTGGAGTGGATTGGGTATATCTATTACAGTGGGACCACCACTACAACCCCTCCTCAAG<br>AGTCGAGTACCATATCAGTAGACACGTCCAAGAACCAGTTCTCCTGAAAGTGAAGTCTGTGACCGCTGCGGACACGGCCGTGT<br>ATTACTGTGCGAGA CCGTCTTACCCGAACGACGAGGATGCTTTTGATATCTGGGGCCAAGGGACAATGGTCACCGTCTCTTCAG                        | 99.6%             |
| 2K      | IgK      | TCCTATGTGCTGACTCAGCCACCCTCAGTGTCACTGGCCCCAGGAAAGACGGCCAGGATTACCTGTGGGGGAAACAACATTGGAA<br>GTAAAAGTGTGCACTGGTACCAGCAGAAGCCAGGCCAGGCCCTGTGCTGGTTCATCTATTATGATAGCAGCCGGCCCTCAGGGAT<br>CCCTGAGCGATTCTCTGGCTCCAACTCTGGGAACACGGCCACCCTGACCATCAGCAGGGTGAAGCCGGGGATGAGGCCGACTAT<br>TACTGTCAAGTGTGGGATAGTAGTAGTGATCTTCTTTGGTGTCTCGGCGAGGGACCAAGCTGACCGTCTCTA                                                                                                                        | 100%              |
| 3R      | IgM,D    | ATGAAACATCTGTGGTCTTCTCTCTCTGGTGGCAGCTCCCAGATGGGTCTGTCCCAGGTGCAGCTGCAGGAGTCTGGGGCCAG<br>GACTGGTGGAGCCTTCGGAGACCCGTGTCCTCACCTGCAGTGTCTTCTGGTGGCTCCATGAGTGGATACTACTGGAGCTGGATGCG<br>GCAGTCCCCAGGGAAGGGACTGGAGTGGATTGGATATATCTATTACAGTGGGACCACCGACTACAACCCCTCCTCAAGAGTTCGA<br>GTCACCATATCAGTGGACACGTCCAAGAATCAGTTCTCCTGAAGTTGAGCTCTGTGACCGCTGCGGACACGGCCGTCTATTACT<br>GTGCGAGAGA CCGCCCTATGAAGTATAGTAGTTTGTGAGGTACTACTATTACGGCATGGACGTCTGGGGCCAAGGGACCGCGGT<br>CACCGTCTCCTCAG | 94.74%            |
| 3R      | IgK      | GACATCCAGATGACCCAGTCTCCATCTCTCCTGTCTGCATCTGTAGGAGACAGAGTCACCATCACTTGCCTGGGCAAGTCAAGCA<br>TTAGCAGTTATTTAAATTGGTATCAGCAAATACGAGGGAAGCCCTAAGCTCCTGACTTATGCTGTACCACTTTGGCAAAGTGG<br>GGTCCCATCAAGGTTTCAGTGGCAGTGGATCTGGGACAGATTTCACTCTCACCATCAGCAGTCTACAACCCGAAGACCTTGCAACT<br>TACTATTGTCAACAGACTTACAGTACCCCGTGAGCGTTTCGGCCAAAGGACCAAGGTGGAAATCAAAC                                                                                                                            | 94.62%            |
| 4D      | IgM,D    | ATGGAAGTTTGGGCTGAGCTGGCTTTTCTTGTGGCTAAAATAAAGGTGTCCAGTGTGAGGTGCAGCTGTTGGAGTCTGGGGGAG<br>GCTTGGTACAGCCTGGGGGGTCCCTGAGACTCTCTGTGCAGCCTCTGGATTCTCCTTTAGCAGCTATGCCATGACCTGGGTCCG<br>CCAGGCTCCAGGGAAGGGCTGGAGTGGGTCTCAGCTATAAGTGGTAGGTGCTAGCACATACACGAGCTCCGTGAGGGGC<br>CGGTTACCATCTCCAGAGACAATTCCAATAAACACGCTTTATCTGCAAAATGACAGCCTGAGAGCCAGGAGACACGGCCGTATATT<br>ACTGTGCGAA GATCCCGACGGTGACTA ACTACTCTGGACTCTGGGGCCAGGGACCCCTGGTCACCGTCTCCTCAG                                | 97.57%            |
| 4D      | IgK      | GACATCCAGATGACCCAGTCTCCTTCCACCCTGTCTGCATCTGTAGGAGACAGAGTCACCATCACTTGCCTGGGCGCAGTCAAGTA<br>TTAGTAGCTGGTTGGCCTGGTATCAGCAGAAACAGGGAAAGCCCTGAGCTCCTGATTTATAGGGCGTCTACTTTACAAAGTGG<br>GGTCCCATCAGCTTTTCAGCGGCAGTGGATCTGGGACAGAACTCACTCTCACCATCAGTGCCTGCAGCCTGATGATTTTGCAACT<br>TATTACTGCCAACAGATATAATAGTTATTACTACTTTTCGGGCGAGGGACCAAGGTGGAGATCAAAC                                                                                                                             | 97.13%            |
| 5S      | IgG      | ATGGAAGTTTGGGCTGAGCTGGGTTTCTTGTGTGCTATTTTAAAAGGTGTCCAGTGTGAGGTGCAGCTGTTGGAGTCTGGGGGAG<br>GCTTGGTCCAGCCTGGGGGGTCCCTGAGACTCTCTGTGCAGCCTCTGGATTCTCCTTTGGTGGCTATTGGATGACCTGGGTCCG<br>CCAGGCTCCAGGGAAGGGCTGGAGTGGGTGGCCAAACATAAACCAAGATGGAAGTGACAAATACTATCTGGACTCTGTGGGAGGC<br>CGATTCCACATCTCCAGAGACAGCGCCAAGAACTCCCTGTATCTGCAAAATGAACAGCCTCAGAGCCGAGGACACGGCCATATATT<br>ACTGTGCGAGAG CCGAAGATTGTAGACTATAGCAGCAGTGCTCTGGGGCCAGGGGACCCAGGTCAACCGTCTCCGCAC                       | 95.49%            |
| 5S      | IgL      | CAGCCGCCCTCGGTGTCACTGTCCCGAGGACAAACCGGCCAGGATCACCTGCTCTGGAGATGCATTGCCAAAAAATTTGCTTATT<br>GGTACCAGCAGAGGTCAAGCCAGGCCCTGTGCTGGTCACTATGAGGACAGTAAGCGACCCTCCGGGATCCCTGAGAGATTCTC<br>TGGTCCAGCTCAGGGACATGGCCACCTTGACTATCAGTGGGGCCACGTGGAGGATGAAGCTGACTACTATTGTATTACTCAACA<br>GACAGCAGTGGTAATCAT TGGGTGTTTCGGCGAGGGACCAAGCTGACCGTCTCA                                                                                                                                           | 97.35%            |
| 6L      | IgM,D    | ATGGAAGTGGACCTGGAGGATCCTCTGCTTGGTGGTGTAGCTCCAGGTGTCACTCCCAGGTGCAGCTGGTGCAGTCTGGGGCTG<br>AGGTGAAGAAGCCTGGGGCTCAGTGAAGGTTTCTGCAAGGCATCTGGATACACCTTCACCAGCTACTATATGCACTGGGTGCG<br>ACAGGCCCCCTGGACAAGGGCTTGAGTGGATGGGAATAATCAACCTAGTGGTGGTAGCACAAAGCTACGCACAGAAGTTCCAGGGC<br>AGAGTACCATGACCAGGGACACGTCCACGAGCAGTGTACATGGAGCTGAGCAGCCTGAGATCTGAGGACACGGCCGTGTATT<br>ACTGTGCGAGAGA GTATCCCTTAGTAGTACCAGCTGTATATACTACTACTACTACGGTATGGACGTCTGGGGCCAAGGGACCAC<br>GGTCACCGTCTCCTCAG | 100%              |
| 6L      | IgK      | TCATCACCACGATATTGTGATGACCCAGACTCCACTCTCCTGCCCCTGACCCCTGGAGAGCCGGCTCCATCTCTGCAGGTCT<br>AGTCAGAGCCTCCTGCATAGTAATGGATACAACTATTGGATTGGTACCTGCAGAAGCCAGGGCAGTCTCCACAGCTCCTGATCT<br>ATTTGGGTTCTAATCGGGCTCCGGGGTCCCTGACAGGTTTCAGTGGCAGTGGATCAGGCACAGATTTTACTACTGAAATCAGCAG<br>AGTGGAGGCTGAGGATGTTGGGGTTATTACTGATGCAAGCTCTACAACTCCTCCATTCACTTTTCGGCCCTGGGACCAAGGTG<br>GATATCAA                                                                                                    | 99.33%            |
| 7T      | IgM      | ATGGAAGTGGACCTGGAGGTTCTCTTTGTGGTGGCAGCAGCTACAGGTGTCCAGTCCCAGGTGCAGCTGGTGAATCTGGGGCTG<br>AGTTGAAGAAGCCTGGGTCTCGGTGAAGGTCTCTGCAAGTCTTCTGGAGACACTTTCAACAAGTATGCTTTAAGTTGGCTGCG<br>ACAGGCCCCCTGGACAAGGGCTTGAGTGGATGGGAAGCATCATCCCTCTCCTTGGTACTGCAAATTACGCACAGAATTCAGGGC<br>AGGCTCACGATTACCGCGGACAAATCCACGAGTACAACCTATTTGGAATTGAAGAGCCTGCGATTGAAGACACGGCCGTATATT<br>ACTGTGCGAGAG GGTGGT CAGGACTGGGACGGCTCCGATTCACTACTGGGGCCAGGGAACCTGGTCAGCGTCTCCTCA                           | 89.24%            |
| 7T      | IgK      | GAAATTGTGTTGACGCAGTCTCCAGGACCCTGTCTTTGTCTCCAGGGGAAAGGGCCACTCTCTCCTGCAGGGCCAGTCAAGTG<br>TTAGTGCCAACTCTTTAGCCTGGTACAGCAAAAACCTGGCCGGCTCCAGGCTCCTCATCTATGGTGCATTCAGCAGGGCCAC<br>TGGCATCCCAGACAGGTTTCAGTGCCAGTGGGTCTGGGACAGACTTCACTCTCACCATCAGCAGACTGGAGCCTGAAGATTTTGTA<br>GTGTATTACTGTGACACTATGGTAGTTCACTCGGACGTTTCGGCCAAGGGACCAAGGTGGAAATCAAAC                                                                                                                              | 94.33%            |

|     |       |                                                                                                                                                                                                                                                                                                                                                                                                                                                                                                      |        |
|-----|-------|------------------------------------------------------------------------------------------------------------------------------------------------------------------------------------------------------------------------------------------------------------------------------------------------------------------------------------------------------------------------------------------------------------------------------------------------------------------------------------------------------|--------|
| 8S  | IgM   | ATGGAGTTTGGGCTGAGCTGGCTTTTCTTGTGGCTAAAAATAAAGGTGTCCAGTGTGAGGTGCAGATGTTGGAGTCTGGGGGAG<br>GCTTGTATACAGCCGGGGGGTCCCTGAGACTCTCCTGTGAAGCCTCTGGATTACCTTTAGCAGCTATGCCATGAGTGTGGGTCCG<br>CCAGGCTCCAGGGCAGGGGCTGGAGTGGGTCTCCGGTATCAGCAGTAGTGGTGGGACCACATACTACACAGACTCCGTGAAGGGC<br>CGGTTACCATCTCCAGAGACAATACCAAGAACACTTTATATCTGGAAATGAAGAGGCTGAGAGTGCAGGACACGGCCTTATATT<br>ACTGTTCAAAGA <b>TCAGGCGCAACA</b> <b>CTCTTACTAGTTTCCCTTAGTTACTGGTATTT</b> <b>CGATCTCTGGGGCCGCGCACCTGGT</b><br><b>CACTGTGTCTCTAG</b> | 92.01% |
| 8S  | IgK   | GCCATCCGGATGACCCAGTCTCCATCCTCATTCTCTGCGTCTTCAGGAGACAGAGTCAACATCACTTGTCTGGGCGAGTCAAGGTA<br>TTAGCAGTTACTTTGGCCTGGTATCAGCAAAAATTAGGGGAGGCCCCCTAAACTCCTGATCTATTCTGCATCCACTTTGCAAAGTGG<br>GGTCCCATCAAGGTTTCAGCGGCAGTGGCTCTGGGACAGATTTCACTCTCACCATCAGCTGCCTGCAGTCTGAAGACTTTGCAACT<br>TATTACTGTCAACAGTATTATAGTTACCC <b>ACTCACTTTCGGCGGAGGGACCAACATTGACATCAAAC</b>                                                                                                                                           | 95.34% |
| 9M  | IgM   | ATGGACTGGACCTGGAGGTTCTCTTTGTGGTGGCAGCAGCTACAGGTGTCCAGTCCCAGGTGCAGCTGGTGCAGTCTGGGGCTG<br>AGGTGAAGAACCTGGGTCTCGTGGAAGGTCTCCTGCAAGGCTTCTGGAGGCACCTTCAGCAGCTATGCTATCAGCTGGGTGCG<br>ACAGGCCCCCTGGACAAGGGCTTGAGTGGATGGGAGGGATCATCCCTATCTTTGGTACAGCAAACTACGCACAGAAGTTCAGGGC<br>AGAGTCACGATTACCGCGGACGAATCCACGAGCACAGCCTTACATGGAGCTGAGCAGCCTGAGATCTGAGGACACGGCCTGTATT<br>ACTGTGCGAG <b>CGTCGAGGTACCTGGAATACGTTACGCTTGACTACTGGGGCCAGGGAACCTGGTCACCGTCTCTCTAG</b>                                              | 100%   |
| 9M  | IgL   | CAGTCTGTGCTGACTCAGCCACCCTCAGCGTCTGGGACCCCCGGGCAGAGGGTCACCATCTCTTGTCTGGAAGCAGCTCCAACA<br>TCGGAAGTAATTATGTATACTGGTACCAGCAGCTCCAGGAACCGCCCCAAACTCCTCATCTATAGGAATAATCAGCGGCCCTC<br>AGGGGTCCCTGACCGATTCTCTGGCTCCAAGTCTGGCACCTCAGCCTCCCTGGCCATCAGTGGGCTCCGGTCCGAGGATGAGGCT<br>GATTATTACTGTGCGAGCATGGGATGACAGCTGAGTGGT <b>CGGTGTTTCGGCGGAGGGACCAAGCTGACCGTCTCTAG</b>                                                                                                                                        | 98.92% |
| 10S | IgM,D | ATGAAACACCTGTGGTCTTCTCTCTCCTGGTGGCAGCTCCAGATGGGTCTCTGCCAGGTGCAGCTACAGCAGTGGGGCGCAG<br>GACTGTTGAAGCCTTCGGAGACCCTGTCCCTCACCTGCGTGTCTATGGTGGGTCTTCAGCGGTTACTACTGGAGCTGGATCCG<br>CCAGTCCCCAGGGAAGGGGCTGGAGTGGATTTGGGAAATCAATCATAGTGAAGCACCAACTACAACCCGTCCTCAAGAGTCGA<br>GTCACCATATCAGTAGACACGTCCAAGAATCAGTTCTCCCTGAACTGAGGTCTGTGACCGCCGCGGACACGGCTGTGTATTACT<br>GTGCGAGA <b>CCGTTCGACTATGACAGCCCTTTGTGGAATGGGCGCAGGGAACCTGGTCACCGTCTCTCTAG</b>                                                           | 97.98% |
| 10S | IgK   | GACATCCAGATGACCCAGTCTCCATCCTCCTGTCTGCTCTGTAGGAGACAGAGTCAACATCACTTGCCGGGCAAGTCAGGGCA<br>TTAGAAATGATTTAGGCTGGTTTTCAGCAAAAACAGGGAAGCCCCCTAAGCGCCTCATCTATGCTGCATCCACTTTGCAAACCTGG<br>GGCCCCATCGAGGTTTCAGCGGCAGTGGATCTGGGACAGAAATTCATCTTACAATCACCAGCCTTCAGCCTGAAGATTTTGCAACT<br>TATTACTGTCTACAAATATAATCATTTACCCTC <b>GGACGTTTCGGCCAAAGGGACCAAGTGGAGATCAAAC</b>                                                                                                                                            | 94.98% |
| 11K | IgD,M | ATGAAACACCTGTGGTCTTCTCTCTCCTGGTGGCAGCTCCAGATGGGTCTCTGCCAGGTGCAGCTGCAGGAGTCGGGGCGCAG<br>GACTGTTGAAGCCTTCGGAGACCCTGTCCCTCACCTGCGTGTCTATGGTGGGTCTTCAGTGGTTACTACTGGAGCTGGATCCG<br>CCAGCCCCCAGGGAAGGGGCTGGAGTGGATTTGGGAAATCAATCATAGTGAAGCACCAACTACAACCCGTCCTCAAGAGTCGA<br>GTCACCATATCAGTAGACACGTCCAAGAACCAGTTCTCCCTGAAGCTGAGCTCTGTGACCGCCGCGGACACGGCTGTGTATTACT<br>GTGCGAGAGG <b>AGGCTATGATAGTAGTGGTTATCCAATAGCTTTTGATATCTGGGGCCAAGGGACAATGGTCACCGTCTCTCTAG</b>                                           | 98.95% |
| 11K | IgL   | CAGGCTGTGCTGACTCAGCCGTCTTCCCTCTCTGCATCTCCTGGAGCATCAGCCAGTCTCACCTGCACCTTACGCAGTGGCATCA<br>ATGTTGGTACCTACAGGATATACTGGTACCAGCAGAAGCCAGGGAGTCTCCTCCAGTATCTCCTGAGGTACAATCAGACTCAGA<br>TAAGCAGCAGGGCTCTGGAGTCCCCAGCCGCTTCTGTGGATCCAAAGATGCTTCGGCCAAATGCAGGGGATTTTACTCATCTCTGGG<br>CTCCAGTCTGAGGATGAGGCTGACTATTACTGTATGATTTGGCACAGCAGCGTT <b>GGGTATTTCGGCGGAGGGACCAAGCTGACCG</b><br><b>TCCTAG</b>                                                                                                           | 100%   |
| 12O | IgM   | ATGAAACACCTGTGGTCTTCTCTCTCCTGGTGGCAGCTCCAGATGGGTCTCTGCCAGGTGCTTCTACAGCAGTGGGGCGCAG<br>GTCTGTTGAAGCCTTCGGAGACCCTTGTCCCTCACTTGCCTGTCTATGGTGAAGTCTTCAGTACTTCCCACTGGAGCTGGATCCG<br>CCAGCCCCCAGGGAAGGGGCTGGAGTGGATTTGGGACAGATCAATCATAGTGAAGCACCAACTACAACCCGTCCTCAAGAGTCGA<br>GTCACCATATCAATTGACACGTCCAAGAAGCAGTTTCTCCCTGAAGCTGAGCTCCGTGACCGCCGCGGACACGGCTCTTTATTATT<br>GTGCGGGA <b>AAGGGAACATCTATAGGCCCTTGACTACTGGGGCCAGGGAACCTGGTCACCGTCTCTCTAG</b>                                                      | 91.93% |
| 12O | IgK   | GAAATTTGTGTTGACACAGTCTCCAGGCACCTGTCTTTGTCTCCAGGGGAAGAGGCACCTCTCCTGCAGGGCCAGTCAAGTG<br>TTAACAGCACCTACTTAGCCTGGTACCAGCAAAACCTGGCCAGGCTCCCAGGCTCCTCATCTCTGGTGCATCCACAGGGCCAC<br>TGGCATCCAGACAGGTTTCACTGGCAGTGGGTCTGGGACAGGCTTCACTCTCACCATCAGCAGACTGGAGCTGAAGATTTTGCA<br>GTGTATTACTGTGACAGTGTGGTAATTACC <b>GTGCACTTTTGGCCAGGGGACCAAGCTGGACATCAAAC</b>                                                                                                                                                    | 96.1%  |
| 13S | IgG   | ATGGACACACTTTGCTCCACGCTCCTGTGCTGACCATCCCTTCATGGGTCTTGTCCAGATTACCTTGAAGGAGTCTGGTCTCTA<br>CGCTGGTGAAGCCACACAGACCCTCACACTGACCTGCACCTTGTCTGGGTCTCTGCTCACCACCTCATGGAGTGGGTGTGGGCTG<br>GATCCGTCACCCCCCGGAAAGGCCCTGGAATGGCTTGCCTCATCTATTGGGATAATGATAAGCGCTACAGCCCCCTCTCTGAAA<br>AAAGACTCGCCATCGCCACAGACACGTCCAAAAACAGCAGTGGTCTTCCGAATGACCGACATGAGCCCTCTGGACACAGGCACAT<br>ATTATTGTGCCACAGAC <b>ACGTGGATCGGTACTTCGATGTCTGGGGCCGTGGCGCCCTAGTTTCTGTCTCTCTAG</b>                                                 | 89.96% |
| 13S | IgK   | GACATCGTGATGACCCAGTCTCCAGGCTCCCTGTCTTTGTCTCTGGGCGCGACGGCCACCATCACCTGCAAGGCCAGTGGACTA<br>TCTTGTCCACCTCCAATAATAAGACTTACTTAGCCTGGTACCAAGCTAAACGAGGACGGCCTCCAAGATTACTCTTTTATTGGGC<br>GTCTAACCGACACTCCGGGGTCCCTGACCGATTAGTGGCAGCGCTTCTGGAACGCATTTTCGCTCTCACCATAAGGAACGTGCAG<br>GCTGAAGATGTGGCAGATTATTACTGTGACCAATAATAGTACTCC <b>GTACACTTTTGGCCAGGGGACCAAGCTGGAGATCAAGC</b>                                                                                                                                | 82.49% |
| 14K | IgM   | ATGGAGTTTGGGCTGAGCTGGCTTTTCTTGTGACTACTTTAAAGGTGTCCGGTGTGAGGTGCAGTTATTGGAGTCTGGGGGAG<br>GCTTGGTTCAGCCGGGGGGTCCCTCAGACTCAGCTGCGCAGCCTCTGGATTCACTTTTAATAAATTATGCCATGAGTGGGTCCG<br>CCAGTTTCCAGGGAAGGGGCTGGAGTGGGTCTCCACTATCAGTGGCACTGGTACTAGAACATTCTTCTCAGACTCCGTGACGGGC<br>CGCTTCAACATTTCTAGAGACAATGACAGGAACACGGTGTCTCTACAAATGAACCTCCTGAGAGTGCAGGACACGGCCGTCTATT<br>TCTGTGCGAA <b>GAATTCGTGCGGACGTGGTATCTTCTGTCTGGTGGACAGAGCGCGCTGAATATTTCCACCCTGGGGCT</b><br><b>GGGCACTCTGGTCACTGTCTCTCTAG</b>         | 85.76% |
| 14K | IgK   | GACATCGTGATGACCCAGTCTCCAGACTCCCTGGCTGTGTCTCTGGGCGAGAGGGCCACCATCAACTGCAAGTCCAGCCAGACTG<br>TTTTATACAACCTCCAACAATAAAAACTACTTAGCTGGTACCAGCAGAAACAGGACAGCCTCCTAAGCTGCTCATTTTACTGGGC<br>ATCTACCCGGGAATCCGGGGTCCCTGACCGTTTTCAGTGGCAGCGGTCTGGGACAGATTTCACTCTCACCATCAGCAGCCTGCAG<br>GCTGAAGATGTGGCAGTTTATTACTGTGACCAATATTATAATACTCC <b>GTACACTTTTGGCCAGGGGACCAAGCTGGAGATCAAAC</b>                                                                                                                             | 97.87% |
| 15B | IgM   | ATGGAGTTTGGGCTGAGCTGGGTTTCTTGTGTACTATTATAAAGGTGTCCAGTGTGAGGTGCAGTGGTGGAGTCTGGGGGAG<br>GCTTGGTCAAGCCTGGAGGGTCCCTGAGACTCTCTTGTGTAGCCTCTGGATTACCTTCAGTGACTACCATATGAGTGGATCCG<br>CCAGGCTCCAGAGGGGGGCTGGAGTGGCTTCAAACATTAGTAGGAGTGGTGACACCATCAACTACGCAGACTCTGTCAAGGGC<br>CGATTTATCATCTCCAGGACAACGCCAGGAATTCATTGTTTCTGCAATGAACAGCCTGAGAGGCGAAGACACGGCCGTCTATT<br>ACTGTGCGAG <b>GGGCGTTGGTTCGGTGGACTACTGGGGCCAGGGAACCTGGTCACCGTCTCTCTAG</b>                                                                 | 90.97% |

|     |     |                                                                                                                                                                                                                                                                                                                                                                                                                                                                                          |        |
|-----|-----|------------------------------------------------------------------------------------------------------------------------------------------------------------------------------------------------------------------------------------------------------------------------------------------------------------------------------------------------------------------------------------------------------------------------------------------------------------------------------------------|--------|
| 15B | IgK | GACATCCAGATGACCCAGTCTCCATCCTCCCTGTCTGCATCTGTGGGAGACAGAGTCACCATCACTTGCCGGGCAAGTCACGACA<br>TTAGAAATGATTTAGGCTGGTATCAGCAGAAACCAGGAAAGCCCTAAGCGCCTAATCTACGCTGCATCTAGTTTGCAAAGTGG<br>GGTCCCATCAAGGTTCAGCGGCAGTGGATCTGGGACAGAATTCACCTCTCACAATCAGCAGCCTGCAGCCTGAAGATTTTGCAACT<br>TATTTCTGTCTACAGCATGATAGTTATCCTC <b>GCAC</b> TTTCGGCC <b>CAAGGGACACGACTGGACATTAACC</b>                                                                                                                          | 96.58% |
| 16B | IgM | CAGGTGCAGCCACAACAGTGGGGCGCAGGACTGTTGAAGCCTTCGGAGACCCCTGTCCCTCACCTGCGCTGTCTATGGTGGGTCCC<br>TCAGTGGCTTCTTGTGGAGCTGGGTCCGCCAGCCCCAGGGAAGGGGCTGGAGTGGATTGGAGAAATCAATTATAGTGGAAGTAC<br>CAACTACAATCCGTCCCTCAAGAGTCGAGTCACCATATCAGCAGACATGTCCAAGAACCAGTTCTCCCTGAAGTTGAACTCTGTG<br>ACCGCCGCGGACACGGCTGTTTACTACTGTGCG <b>CCCGCGGT</b> <b>TGGGGGGTCTTGACTCCTGGGGCCAGGGAACCTTGGTCACCG</b><br><b>TCTCCTCAG</b>                                                                                       | 94.04% |
| 16B | IgK | GAAATTGTGTTGACGCAGTCTCCAGGCACCCTGTCTTTGTCTCCAGGGGAAAGAGCCACCCTCTCCTGCAGGGCCAGTCAGAGTG<br>TTACTAACAGCTACTTTAGCCTGGTACCAGCAGAAACCTGGCCAGGCTCCAGGCTCCTCATCTATGGTGCATCCAGCAGGGCCAC<br>TGGCATCCAGACAGGTTCAGTGGCAGTGGGTCTGGGACAGACTTCACTCTCACCATCAGCAGACTGGAGCCTGAAGATTTTGCA<br>GTGTATTACTGTGCAGCAATATGTTAGCCCACTC <b>GGACGTTTCGGCCAAGGGACCAAGGTGGAAATCAAAC</b>                                                                                                                                | 98.58% |
| 17K | IgM | GTGCAGCTGGTGCAGTCTGGACCAGAGGTGAAAAAGCCCGGGGAGTCTCTGAAGATCTCCTGTAAGGGTTCTGGATACAGCTTTA<br>CCACCTACTGGATCGGCTGGGTGCGCCAGATGCCCGGAAAGGCCCTGGAGTGGATGGGGATCATCTATCCTGGTGACTCTGATAC<br>CAGATACAGCCCGTCCTTCCAAGGCCAGGTCACCATCTCAGCCGACAAGTCCATCAGTACCGCTACCTGCAGTGGAGCAGCCTG<br>AAGGCCTCGGACAGCGCCATGTATTACTGTGCGAGACA <b>GTCTGGGGGTCTTGACTACTGGGGCCAAGGGACCCCTGGTCACCGTCT</b><br><b>CCTCAG</b>                                                                                                | 98.60% |
| 17K | IgK | GAGGTGCAGCTGGTGCAGTCTGGACCAGAGGTGAAAAAGCCCGGGGAGTCTCTGAAGATCTCCTGTAAGGGTTCTGGATACAGCT<br>TTACCACCTACTGGATCGGCTGGGTGCGCCAGATGCCCGGAAAGGCCCTGGAGTGGATGGGGATCATCTATCCTGGTGACTCTGA<br>TACCAGATACAGCCCGTCCTTCCAAGGCCAGGTCACCATCTCAGCCGACAAGTCCATCAGTACCGCTACCTGCAGTGGAGCAGC<br>CTGAAGGCCTCGGACAGCGCCATGTATTACTGTGCGAGACA <b>GTCTGGGGGTCTTGACTACTGGGGCCAGGGAACCTTGGTCACCG</b><br><b>TCTCCTCA</b>                                                                                               | 98.61% |
| 18B | IgM | GAGCTGGTTTCCTTGTGTTTTGTAGCAGGTGTCCAGTGTGAGGTGTATTTGGTGGAGTCTGGGGGAGGCTTGGTCCAGCCTGGGT<br>CGTCCCTGAGACTCTCATGTGCAGCCTCTGGATTATCTTTAATGACTTTTGGATGAGTTGGGTCCGCCAGGCTCCAGGGAAGGG<br>ACTGGAGTGGGTGGCCAAATATAAATCAAGATGGACTTGAAAGCATTATCTGGACTCTGTGAAGGGTCGATTTCATCATATCCAGG<br>GACAAACACCAAGAGTTGTCTCTTTCTTCAAATGAACAACCTTGAGAGTTCGAGGACACGGCTAAATATTATT <b>TCAGTGCCGGGACT</b><br><b>TCTTTGACTTCTGGGGCAAGGGAATCCTGGTCAGCGTCTCGTCAG</b>                                                       | 85.42% |
| 18B | IgL | CAGTCTGTCTGTGACGCAGCCGCCCTCAGTGTCTGGGACCCCGGACAGACGGTCAGCATCTCTTGCTCTGGAAGCACTTCCAACA<br>TCGCAACTAATACCGTAAACTGGTACAGGCAAGTCCAGGGACGGCCCCCAAACCTCCTCATCTACACTAATGATCAGCGGCCCTC<br>AGGAGTCACTGACCGATTCTCTGGCTCCAAGTCTGGCACCTCAGGATCCCTGGACATCAGTGGACTCCAGTCTGACGATGAGGCT<br>GATTATTTTGTGACGCGTGGGAT <b>AGTGA</b> CCTGAGTGG <b>ATGGCTTTTCGGCGGAGGGACAGGCTGACCGTCCTAG</b>                                                                                                                   | 87.02% |
| 19V | IgG | ATGGAGTTTGGGCTGAGCTGGCTTTTCTTGTGGCTAAAAATAAAAGGTGTCCAGTGTGAGGTGCAGCTGTTGGAGTCTGGGGGAG<br>GCTTGGTACAGCCTGGGGGTCCCTGAGACTCTCATGTGGAGGCTCTGGATTACCTTTAGTATGTTTCGCCATGACCTGGGTCCG<br>CCAGGCCCCGGGGAAGGGACTGGAGTGGGTCTCGACTATTTCTCGTGATGGAGCGTCCACATCATACGCAGACTCCGTGAAGGGC<br>CGGTTACCATCTCCAGAGACAACGCCAAGAACACCTTATGTCTGCAAAATGAACAGCCTGAGAGTGAAGACACGGCCGTCTATT<br>ATTGTACGAA <b>GTGCGCGTATTTCACCAAGTTGCTTGCGGTCCCTCAATATTTCACCGT</b> <b>TGGGGCCAGGGCACCTGGTCAACGT</b><br><b>CTTCTCAG</b> | 87.50% |
| 19V | IgL | TCCTATGTGCTGACTCAGCCACCCTCGGTGTGAGTACCCAGGAAAGACGGCCAAGATTCCCTGTGGGGGACATAAACTTGGAG<br>GTGAAAGTGTCCACTGGTACCAGCAGATGCCAGGCCAGGCCCTGTGTTGGTCATCCATGATGACACTGAGCGGCCCTCAGGGAT<br>CCCAGACCGATTCTCTGGCTCCAAGTCTGGGAGCACGGCCACCCTGACCATCAGCAGGTCGAGGCCGGGATGAGGCCGACTAT<br>TTTTGTGAGGTGTGAATACTACTCGTGATCAT <b>CGGGTTCGGCGGAGGGACCAAGCTGACCGTCCTTG</b>                                                                                                                                        | 89.61% |

Variable gene segment (VH, Vk, VL) are green, joining (J) are blue, non-template or N(D)N – red.

**Table S2.** Idiotypic peptides for patients 7T and 12O, used in study.

| Peptide    | Sequence                                                                                           |
|------------|----------------------------------------------------------------------------------------------------|
| 7T_VH_39   | V <b>S</b> C <b>K</b> S <b>S</b> G <b>D</b> T <b>F</b> N <b>K</b> Y <b>A</b> L                     |
| 7T_VH_62   | Q <b>G</b> P <b>E</b> W <b>M</b> G <b>S</b> I <b>P</b> L <b>L</b> G <b>T</b>                       |
| 7T_VH_97   | T <b>T</b> Y <b>L</b> E <b>L</b> K <b>S</b> L <b>R</b> F <b>E</b> D <b>T</b> A                     |
| 7T_VH_117  | R <b>G</b> W <b>S</b> G <b>T</b> G <b>T</b> A <b>S</b> G <b>F</b> N <b>Y</b> W                     |
| 7T_Vk_186  | A <b>S</b> Q <b>S</b> V <b>S</b> A <b>N</b> S <b>L</b> A <b>W</b> Y <b>Q</b> Q                     |
| 7T_Vk_198  | Y <b>Q</b> Q <b>K</b> P <b>G</b> R <b>P</b> P <b>R</b> L <b>L</b> I <b>Y</b>                       |
| 7T_Vk_207  | R <b>L</b> L <b>I</b> Y <b>G</b> A <b>F</b> S <b>R</b> A <b>T</b> G <b>I</b> P                     |
| 7T_Vk_248  | Y <b>Y</b> C <b>Q</b> H <b>Y</b> G <b>S</b> S <b>P</b> R <b>T</b> F <b>G</b> Q                     |
| 12O_VH_20  | Q <b>V</b> L <b>L</b> Q <b>Q</b> W <b>G</b> A <b>G</b> L <b>L</b> K <b>P</b> S <b>E</b> T <b>L</b> |
| 12O_VH_42  | A <b>V</b> Y <b>G</b> E <b>S</b> F <b>S</b> T <b>S</b> H <b>W</b> S <b>W</b>                       |
| 12O_VH_66  | W <b>I</b> G <b>D</b> I <b>N</b> H <b>S</b> G <b>I</b> T <b>K</b> Y <b>N</b> P                     |
| 12O_VH_85  | R <b>V</b> T <b>I</b> S <b>I</b> D <b>T</b> S <b>K</b> K <b>Q</b> F <b>S</b> L                     |
| 12O_VH_113 | Y <b>C</b> A <b>G</b> K <b>G</b> N <b>I</b> Y <b>G</b> P <b>L</b> D <b>Y</b>                       |
| 12O_VH_120 | I <b>Y</b> G <b>P</b> L <b>D</b> Y <b>W</b> G <b>Q</b> G <b>T</b> L <b>V</b> T                     |
| 12O_Vk_46  | R <b>L</b> L <b>I</b> S <b>G</b> A <b>S</b> T <b>R</b> A <b>T</b> G <b>I</b>                       |
| 12O_Vk_86  | V <b>Y</b> Y <b>C</b> Q <b>Q</b> C <b>G</b> N <b>S</b> P <b>C</b> T <b>F</b> G <b>Q</b>            |

Germline VH/Vk sequence is green, JH/Jk is blue, non-template—red.
